# Supplementary material for: A structural framework for unidirectional transport by a bacterial ABC exporter
Source: PubMed Central journal article supplement — Proc Natl Acad Sci U S A. 2020 Jul 23;117(32):19228–36. doi: 10.1073/pnas.2006526117 (PMC7430982; doi:10.1073/pnas.2006526117), 2020-07-23
Supplement: pnas.2006526117.sapp.pdf [file pnas.2006526117.sapp.pdf]

# PNAS

[www.pnas.org](http://www.pnas.org)

Supplementary Information for

## **A structural framework for unidirectional transport by a bacterial ABC exporter**

Chengcheng Fan<sup>a</sup>, Jens T. Kaiser<sup>a</sup>, and Douglas C. Rees<sup>a,b,1</sup>

<sup>a</sup> Division of Chemistry and Chemical Engineering, California Institute of Technology, Pasadena, CA 91125

<sup>b</sup> Howard Hughes Medical Institute, California Institute of Technology, Pasadena, CA 91125

<sup>1</sup> Correspondence: Douglas C. Rees

**Email:** [dcrees@caltech.edu](mailto:dcrees@caltech.edu)

### **This PDF file includes:**

Figures S1 to S9  
Tables S1 to S9  
SI References



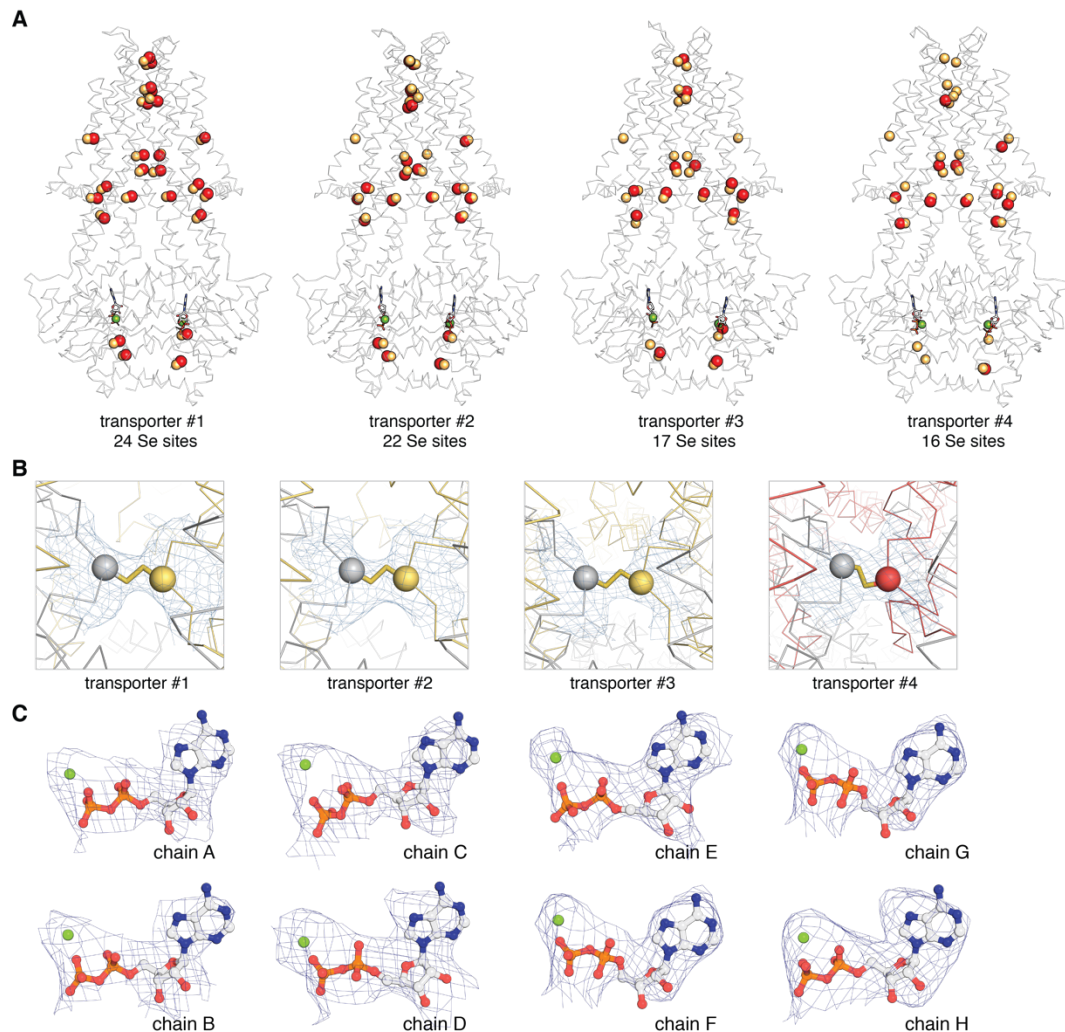

**Figure S2. *NaA527C* inward-facing occluded structures.** (A) Location of selenium sites in the four transporters present in the selenomethionine-substituted *NaA527C* asymmetric unit. The selenium sites identified in Autosol of Phenix (1) are shown in red spheres, the sulfur atoms of methionine residues from the refined model are shown in yellow spheres, and nucleotides are shown in sticks with  $Mg^{2+}$  shown in green spheres. (B) Disulfide bridges in the four transporters in the asymmetric unit. The  $C\alpha$  positions corresponding to C527 in the two chains are depicted as grey and yellow spheres for transporters #1-3, and grey and red spheres for transporter #4, separately. (C) Composite omit map showing the electron densities for the bound MgADP in different chains of *NaA527C* in the asymmetric unit.

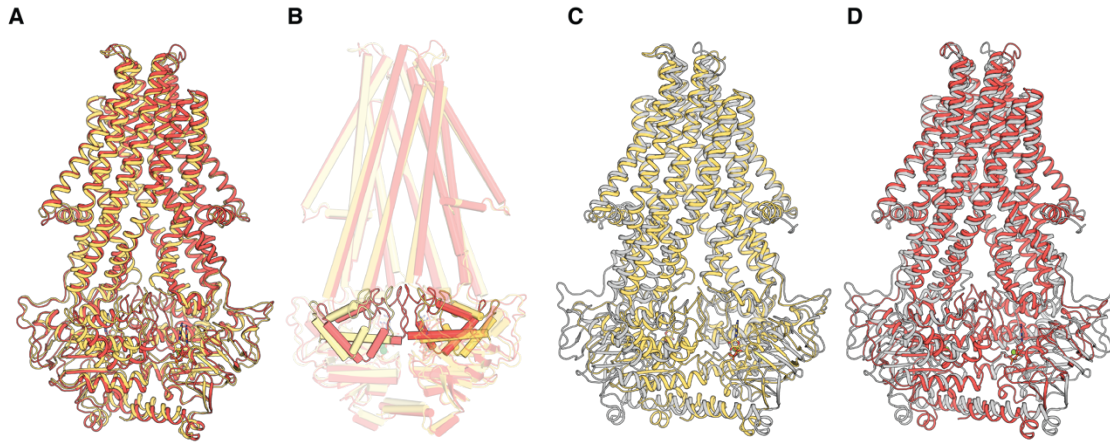

**Figure S3. Structural alignments of *NaA527C* in the inward-facing occluded conformations.**

(A) Alignment of *NaA527C* inward-facing occluded conformation #1 (yellow) to *NaA527C* inward-facing occluded conformation #2 (red) with an overall rmsd of 1.7 Å. The relative rotation of the  $\alpha$ -helical subdomains in the NBDs between the two states is shown in (B). (C) Alignment of *NaA527C* inward-facing occluded conformation #1 (yellow) to *NaAtm1* inward-facing conformation (PDB ID: 4MRN) (grey) with an overall rmsd of 2.1 Å. (D) Alignment of *NaA527C* inward-facing occluded conformation #2 (red) to *NaAtm1* inward-facing conformation (PDB ID: 4MRN) (grey) with an overall rmsd of 4.4 Å. Nucleotides are shown in sticks with  $Mg^{2+}$  shown as green spheres.



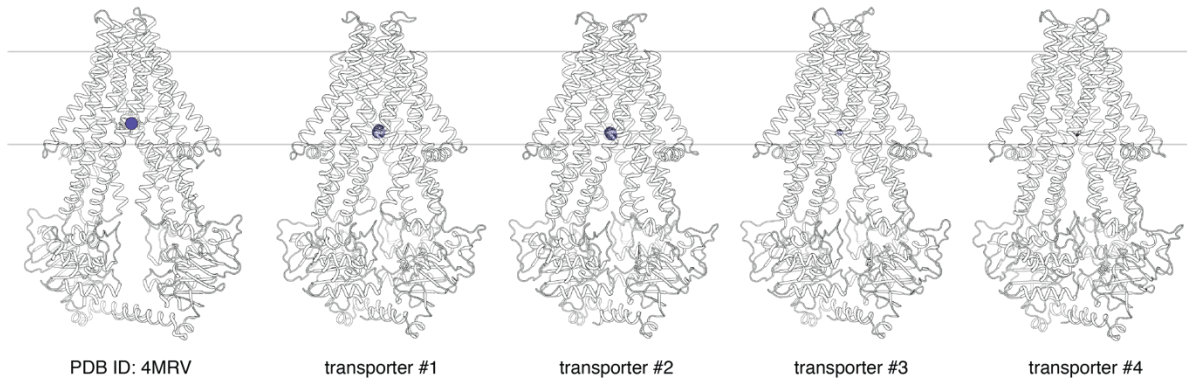

**Figure S4. Binding of GS-Hg to NaA527C inward-facing occluded structures.** Anomalous electron density maps calculated from data collected at the Hg edge, contoured at the  $5\sigma$  levels (dark blue) for NaA527C crystallized in the presence of GS-Hg. For comparison, the structure of NaAtm1 with GS-Hg bound (PDB ID: 4MRV) is indicated (left) with mercury shown in purple sphere. Nucleotides are shown in sticks with  $Mg^{2+}$  shown as spheres.

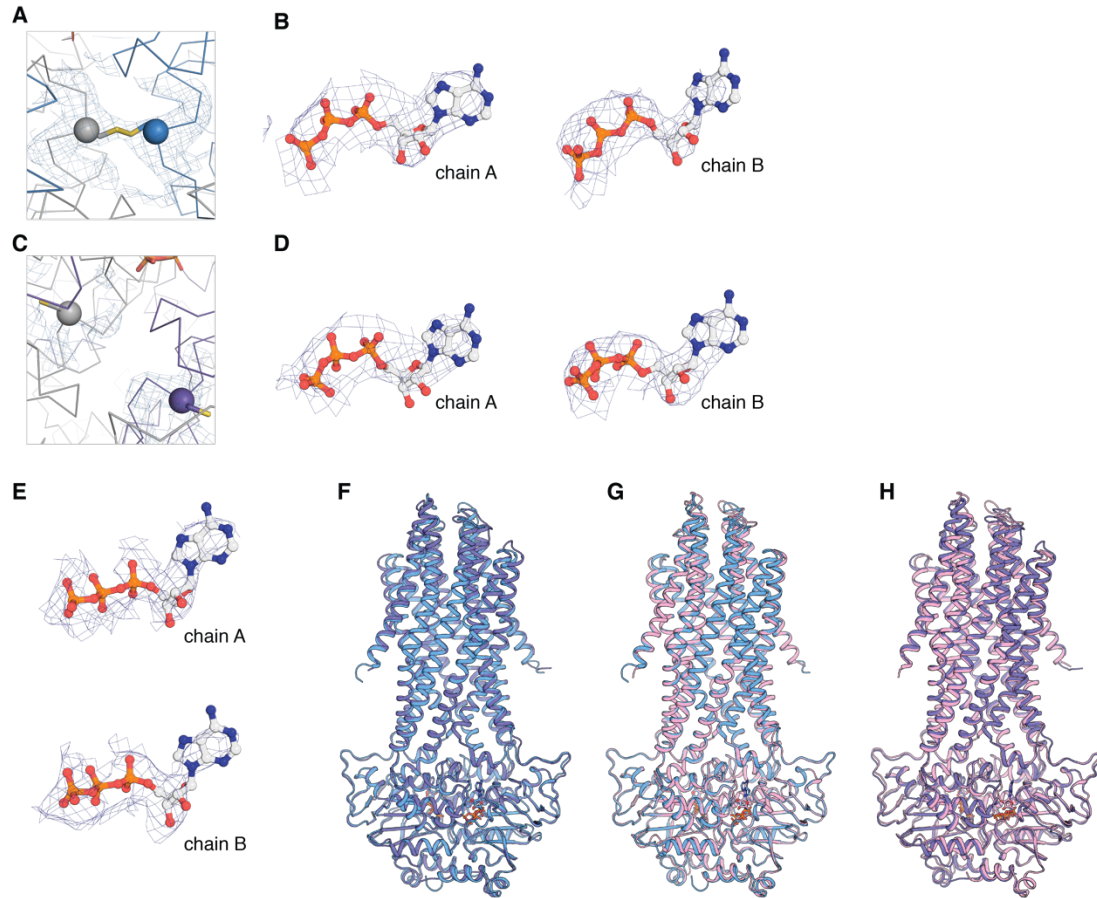

**Figure S5. *NaAtm1* in the occluded conformations.** (A) Disulfide bridge formed by S526C in the *NaS526C* structure with the  $C\alpha$  positions shown as grey and blue spheres. (B) Composite omit map showing the electron densities for the bound ATP in the dimeric *NaS526C* structure. (C) T525C residues in the *NaT525C* occluded structure with the  $C\alpha$  positions shown as grey and purple spheres. (D) Composite omit map showing the electron densities for the bound ATP in the dimeric *NaT525C* structure. (E) Composite omit map showing the electron density for the bound ATP in the dimeric *NaE523Q* structure. (F) *NaT525C* overall structural alignment to *NaS526C* with an overall rmsd of 0.5 Å. (G) *NaE523Q* overall structural alignment to *NaS526C* with an overall rmsd of 0.5 Å. (H) *NaE523Q* overall structural alignment to *NaT525C* with an overall rmsd of 0.7 Å. In (F-H), *NaS526C* is colored in blue, *NaT525C* in purple, and *NaE523Q* in pink. Nucleotides are shown in sticks.

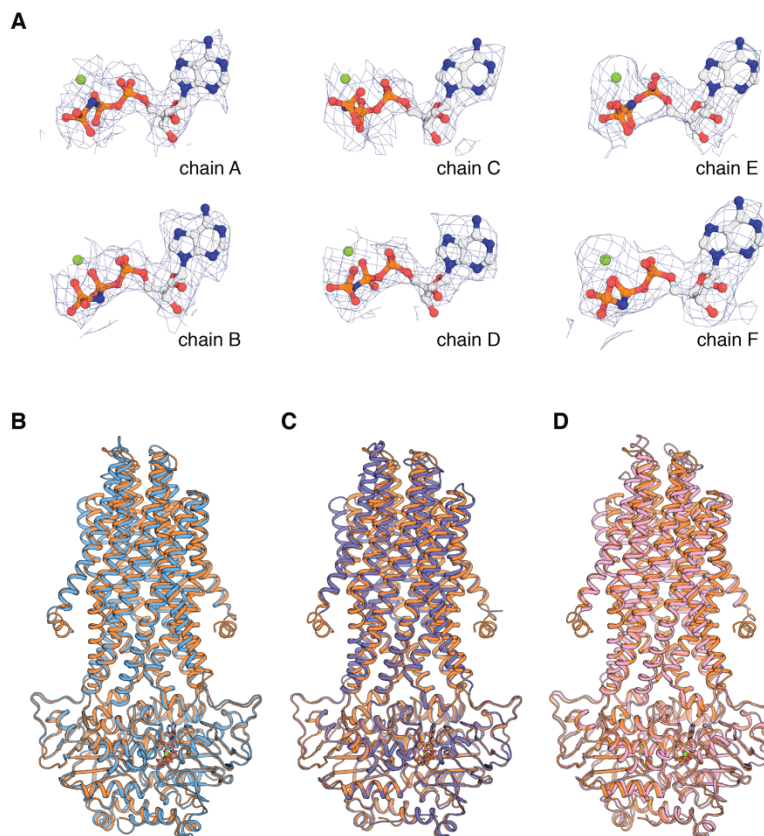

**Figure S6. Structural alignments of wild type *NaAtm1* with MgAMPPNP in the occluded conformation.** (A) Composite omit map showing the electron densities for the bound MgAMPPNP in the three copies of *NaAtm1* in the asymmetric unit. *NaAtm1* occluded structure alignments to (B) *NaS526C* with an overall rmsd of 1.1 Å, (C) *NaT525C* with an overall rmsd of 0.9 Å, and (D) *NaE523Q* with an overall rmsd of 1.1 Å. In (B-D), *NaAtm1* occluded structure colored in orange, *NaS526C* in blue, *NaT525C* in purple and *NaE523Q* in pink. Nucleotides are shown in sticks with Mg<sup>2+</sup> shown as green spheres.

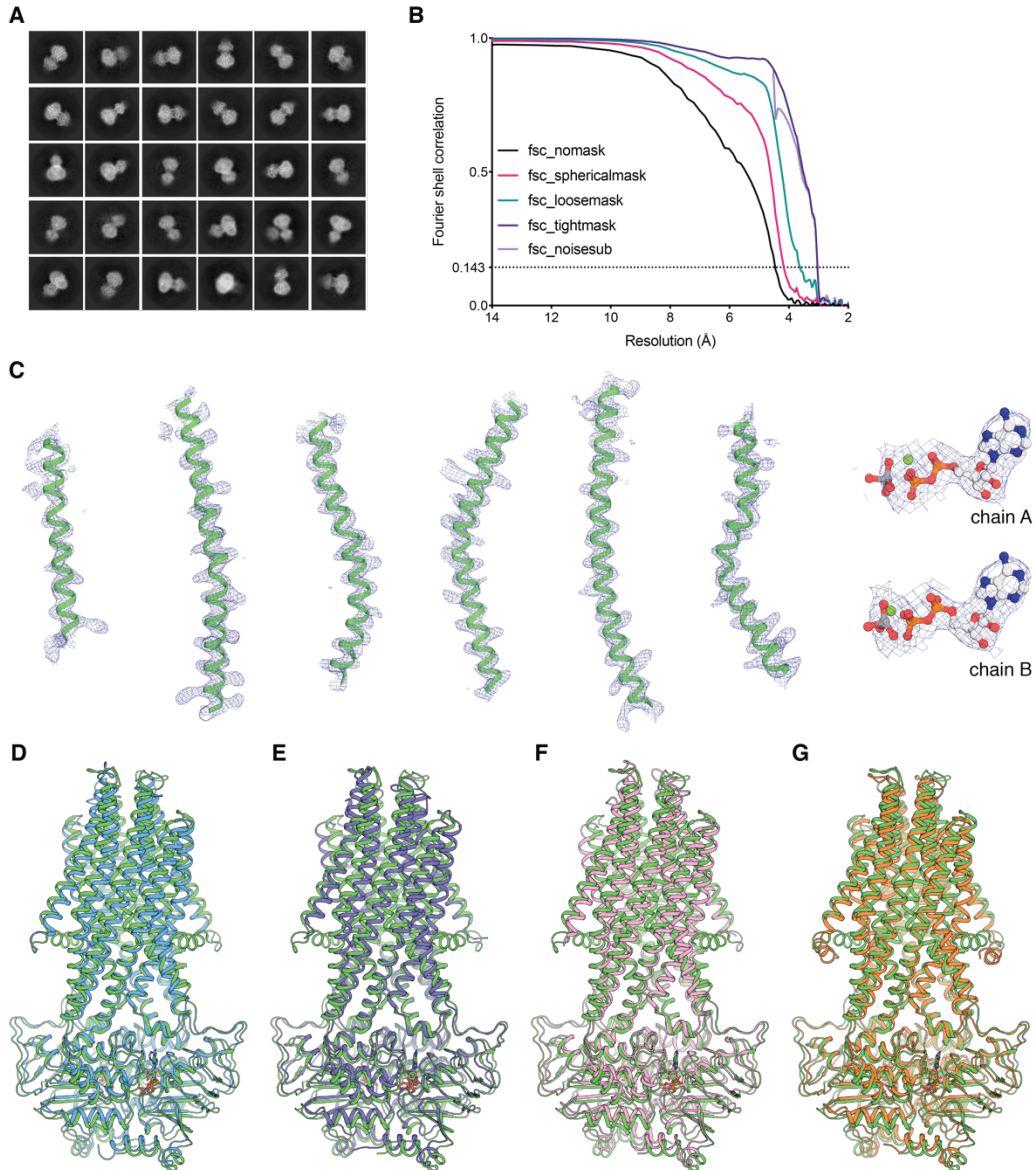

**Figure S7. Single particle cryo-EM structure of *NaAtm1* in the closed conformation stabilized with  $\text{MgADPVO}_4$ .** (A) Examples of 2D classes. (B) Fourier shell correlation (FSC) curve showing the resolution estimate for the final reconstruction, generated from the final refinement in cryoSPARC 2 (2). (C) Density fitting for different TM helices and nucleotides ( $\text{MgADPVO}_4$ ). Overall structural alignments to the occluded crystal structures of (D) *NaS526C*, (E) *NaT525C*, (F) *NaE523Q* and (G) *NaAtm1* occluded with rmsds of 2.0 Å, 2.1 Å, 2.0 Å and 1.7 Å, respectively. In (D-G), the *NaAtm1* closed structure is shown in green, *NaS526C* in blue, *NaT525C* in purple, *NaE523Q* in pink and *NaAtm1* occluded structure is shown in orange. Nucleotides are shown as sticks and  $\text{Mg}^{2+}$  as green spheres.



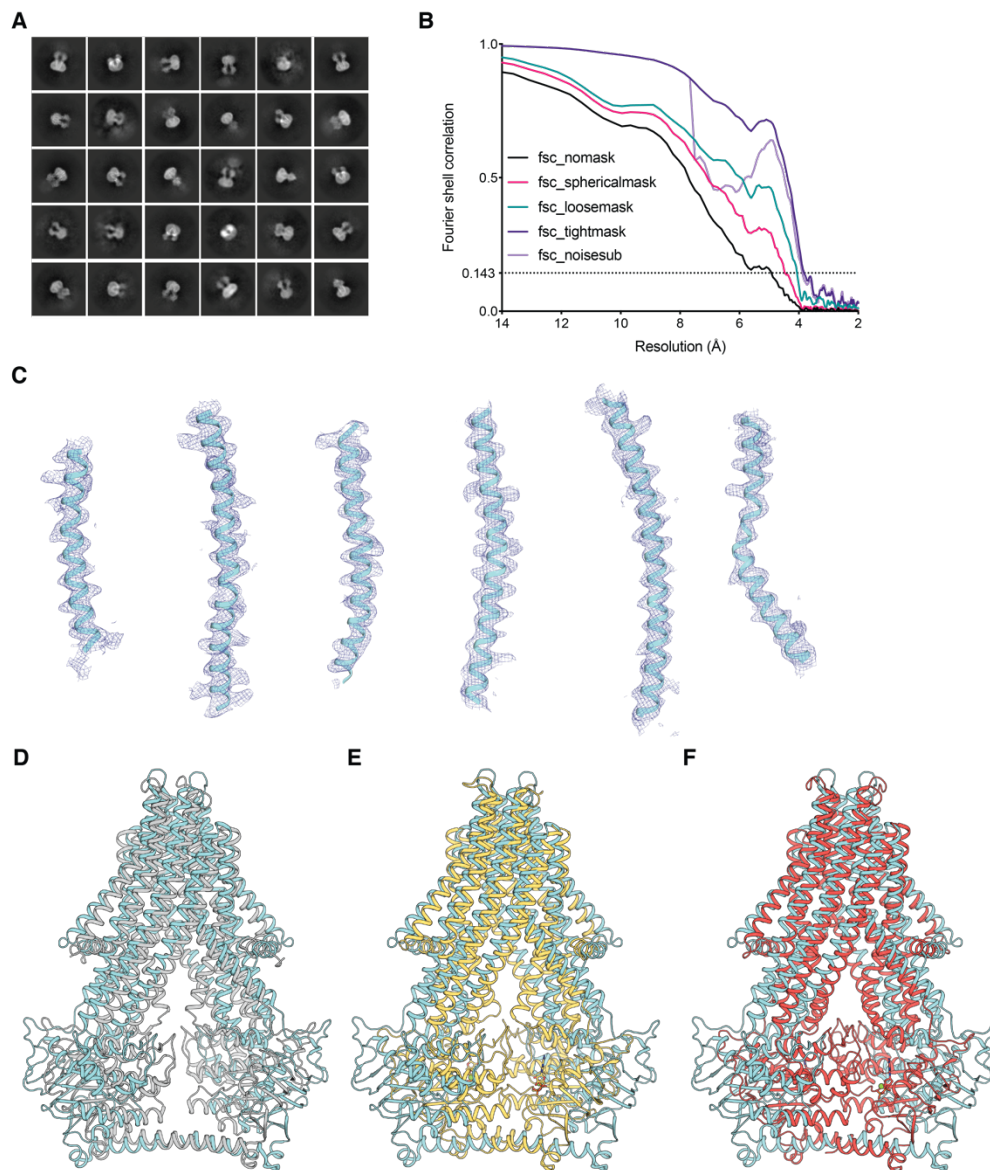

**Figure S8. Single particle cryo-EM structure of NaAtm1 in the wide-open inward-facing conformation.** (A) Examples of 2D classes. (B) FSC curve showing the resolution estimate for the final reconstruction, generated from the final refinement in cryoSPARC 2 (2). (C) Density fitting for different TM helices. Overall structural alignments of the wide-open inward-facing conformation (cyan) to (D) NaAtm1 inward-facing conformation (PDB ID: 4MRN) (grey), (E) NaA527C inward-facing occluded state #1 (yellow), and (F) NaA527C inward-facing occluded state #2 (red) crystal structures with rmsds of 5.8 Å, 8.9 Å, and 9.3 Å, separately.

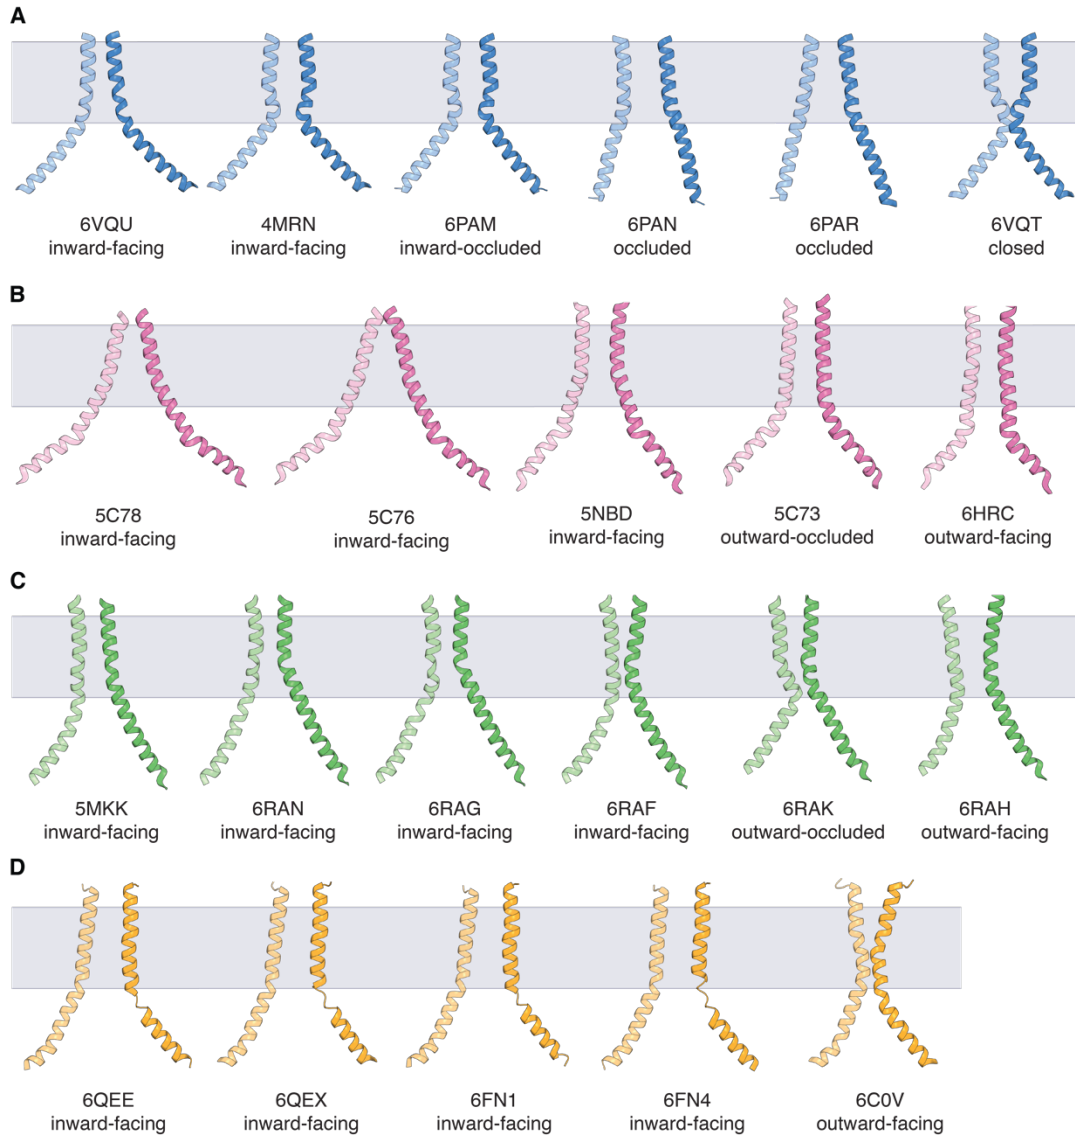

**Figure S9. TM6 comparisons for different ABC transporter systems. (A)** TM6 (residues 300 to 340) arrangements of representative *NaAtm1* structures. **(B)** TM6 (residues 288 to 335) arrangements of representative *PglK* structures. **(C)** TM6 (residues 290 to 333 of chain A and residues 275 to 319 of chain B) arrangements of representative *TmrAB* structures. **(D)** TM6 (residues 324 to 370 and residues 968 to 1013) arrangements of representative *ABCB1* structures. The corresponding PDB IDs and the conformational states are labeled below the structures.

**Table S1. Coupling efficiencies between ATP hydrolysis and substrate translocation for ABC transporters.** Coupling efficiencies for different ABC transporter systems (3-17). Coupling efficiencies are either presented in the corresponding reference or calculated based on the reported ATPase and transport activities of the transporter. Coupling efficiency = ATPase activity/transport activity.

| Transporters   | ATPase activity (nmol/min/mg) | Transport Activity (nmol/min/mg) | Coupling efficiency | References               |
|----------------|-------------------------------|----------------------------------|---------------------|--------------------------|
| <b>ABCC3</b>   | 200                           | 1,200                            | 0.17                | Zehnpfennig et al (2009) |
| <b>MalFGK</b>  | ~ 1.5 - 3                     | ~0.5 - 2                         | 1.4 - 17            | Davidson et al (1990)    |
| <b>OpuA</b>    | ~80 - 120                     | ~30 - 70                         | 2                   | Patzlaff et al (2003)    |
| <b>GlnPQ</b>   | 15 (min <sup>-1</sup> )       | 8.5 (min <sup>-1</sup> )         | 2                   | Lycklama et al (2018)    |
| <b>Pgp</b>     | ~750 - 1,300                  | ~500                             | 2                   | Eytan et al (1996)       |
| <b>ABCG5/8</b> | 110                           | 50                               | 2.2                 | Wang et al (2006)        |
| <b>MalFGK</b>  | ~1.2 - 8                      | ~0.3 - 2                         | 4 - 10              | Dean et al (1989)        |
| <b>Pgp</b>     | ~110                          | ~6                               | 18                  | Dong et al (1996)        |
| <b>HisP</b>    | 580                           | 19                               | 31                  | Nikaido and Ames (1999)  |
| <b>ABCG2</b>   | ~750                          | ~22                              | 34                  | Manolaridis et al (2018) |
| <b>TmrAB</b>   | ~1,100                        | ~30                              | 37                  | Hofmann et al (2019)     |
| <b>BtuCDF</b>  | ~400                          | ~4                               | 100                 | Borths et al (2005)      |
| <b>NaAtm1</b>  | 150                           | 1.5                              | 100                 | This study               |
| <b>HmuUV</b>   | ~130                          | ~1.1                             | 120                 | Woo et al (2012)         |
| <b>MalFGK</b>  | 4,000                         | 1.2                              | 3,300               | Chen et al (2001)        |
| <b>ABCB6</b>   | 610                           | 0.03                             | 20,000              | Chavan et al (2013)      |



**Table S2. Raw ATPase activities of NaAtm1 and variants in both proteoliposomes and detergent.** The ATPase activities were measured in triplicate at 10 mM MgATP and 2.5 mM GSSG at 37 °C.

| Conditions                           | Variants                        |                   |                    |                   |                  |
|--------------------------------------|---------------------------------|-------------------|--------------------|-------------------|------------------|
|                                      | NaAtm1                          | NaA527C           | NaS526C            | NaT525C           | NaE523Q          |
|                                      | <b>In proteoliposomes</b>       |                   |                    |                   |                  |
| <b>+ 10mM MgATP</b>                  | 51.90                           | 1.26              | 55.21              | 13.28             | 1.22             |
|                                      | 77.01                           | 2.97              | 52.58              | 15.39             | 1.86             |
|                                      | 67.60                           | 2.93              | 54.32              | 13.43             | 1.00             |
| <b>Average</b>                       | <b>66 ± 13</b>                  | <b>2 ± 1</b>      | <b>54 ± 1</b>      | <b>14 ± 1</b>     | <b>1.4 ± 0.4</b> |
|                                      | <b>In detergent (DDM/C12E8)</b> |                   |                    |                   |                  |
| <b>+ 10mM MgATP<br/>+ 2.5mM GSSG</b> | 118.68                          | 7.55              | 69.50              | 20.88             | -0.08            |
|                                      | 179.94                          | 5.66              | 70.29              | 21.00             | -0.46            |
|                                      | 157.94                          | 6.18              | 68.06              | 20.55             | 0.48             |
| <b>Average</b>                       | <b>152 ± 31</b>                 | <b>6 ± 1</b>      | <b>69 ± 1</b>      | <b>20.8 ± 0.2</b> | <b>0.0 ± 0.5</b> |
|                                      | <b>In detergent (DDM/C12E8)</b> |                   |                    |                   |                  |
| <b>+ 10mM MgATP</b>                  | 122.53                          | 11.50             | 108.90             | 57.47             | 5.20             |
|                                      | 125.12                          | 13.32             | 111.60             | 57.37             | 5.76             |
|                                      | 97.76                           | 12.30             | 112.40             | 56.94             | 3.30             |
| <b>Average</b>                       | <b>115 ± 15</b>                 | <b>12.4 ± 0.9</b> | <b>111 ± 2</b>     | <b>57.3 ± 0.3</b> | <b>5 ± 1</b>     |
|                                      | <b>In detergent (DDM/C12E8)</b> |                   |                    |                   |                  |
| <b>+ 10mM MgATP<br/>+ 2.5mM GSSG</b> | 215.77                          | 14.16             | 104.30             | 42.67             | 3.25             |
|                                      | 200.91                          | 15.01             | 103.80             | 42.01             | 4.76             |
|                                      | 202.41                          | 15.10             | 103.20             | 42.88             | 4.26             |
| <b>Average</b>                       | <b>206 ± 8</b>                  | <b>14.8 ± 0.5</b> | <b>103.8 ± 0.6</b> | <b>42.5 ± 0.5</b> | <b>4.1 ± 0.8</b> |

**Table S3. Raw transport activities of NaAtm1 and variants.** The transport activities for various controls and the different NaAtm1 variants were measured in triplicate at 10 mM MgATP and 2.5 mM GSSG at 37 °C.

| Samples                                 | Transport rate (nmol/mg protein) at various time points (min) |                   |                  |                   |                  |                   | Transport rates (nmole/min/mg) |
|-----------------------------------------|---------------------------------------------------------------|-------------------|------------------|-------------------|------------------|-------------------|--------------------------------|
|                                         | 0                                                             | 15                | 30               | 45                | 60               | 75                |                                |
| <b>NaAtm1 PLS<br/>+MgATP<br/>+GSSG</b>  | 28.17                                                         | 45.49             | 69.95            | 81.08             | 113.06           | 141.67            | 1.488                          |
|                                         | 28.05                                                         | 49.95             | 64.09            | 94.01             | 125.89           | 139.62            | 1.554                          |
|                                         | 26.57                                                         | 54.53             | 77.96            | 83.45             | 114.33           | 149.99            | 1.528                          |
| <b>Average</b>                          | <b>27.6 ± 0.9</b>                                             | <b>50 ± 5</b>     | <b>71 ± 7</b>    | <b>86 ± 7</b>     | <b>118 ± 7</b>   | <b>144 ± 5</b>    | <b>1.52 ± 0.03</b>             |
| <b>NaAtm1 PLS<br/>+GSSG</b>             | 26.69                                                         | 26.22             | 30.82            | 34.07             | 34.73            | 39.73             | 0.179                          |
|                                         | 26.08                                                         | 28.78             | 37.44            | 36.06             | 38.74            | 32.31             | 0.1137                         |
|                                         | 26.59                                                         | 30.69             | 36.27            | 35.48             | 31.99            | 38.69             | 0.1211                         |
| <b>Average</b>                          | <b>26.5 ± 0.3</b>                                             | <b>29 ± 2</b>     | <b>35 ± 4</b>    | <b>35 ± 1</b>     | <b>35 ± 3</b>    | <b>37 ± 4</b>     | <b>0.14 ± 0.04</b>             |
| <b>NaAtm1 PLS<br/>+MgATP</b>            | 2.84                                                          | 1.03              | 2.95             | 2.98              | 1.13             | 1.48              | -0.01235                       |
|                                         | 3.39                                                          | 1.59              | 3.58             | 2.29              | 2.17             | 1.83              | -0.01406                       |
|                                         | 3.39                                                          | 2.54              | 4.10             | 2.08              | 1.65             | -1.82             | -0.05857                       |
| <b>Average</b>                          | <b>3.2 ± 0.3</b>                                              | <b>1.7 ± 0.7</b>  | <b>3.5 ± 0.6</b> | <b>2.5 ± 0.5</b>  | <b>1.7 ± 0.5</b> | <b>0 ± 2</b>      | <b>-0.03 ± 0.03</b>            |
| <b>NaAtm1 PLS</b>                       | 3.30                                                          | 1.80              | 3.34             | 2.64              | 1.48             | 1.76              | -0.01782                       |
|                                         | 3.39                                                          | 1.76              | 3.75             | 2.18              | 1.31             | 1.59              | -0.02279                       |
|                                         | 3.39                                                          | 0.16              | 4.03             | 3.30              | 2.04             | 3.95              | 0.01463                        |
| <b>Average</b>                          | <b>3.4 ± 0.1</b>                                              | <b>1.2 ± 0.9</b>  | <b>3.7 ± 0.3</b> | <b>2.7 ± 0.6</b>  | <b>1.6 ± 0.4</b> | <b>2 ± 1</b>      | <b>-0.01 ± 0.02</b>            |
| <b>Liposomes<br/>+GSSG</b>              | 20.25                                                         | 22.67             | 29.57            | 17.30             | 20.47            | 16.88             | -0.06808                       |
|                                         | 14.00                                                         | 21.70             | 25.88            | 18.91             | 16.76            | 16.41             | -0.01854                       |
|                                         | 12.87                                                         | 20.42             | 29.74            | 2.07              | 19.66            | 19.29             | 0.004169                       |
| <b>Average</b>                          | <b>16 ± 4</b>                                                 | <b>22 ± 1</b>     | <b>28 ± 2</b>    | <b>13 ± 9</b>     | <b>19 ± 2</b>    | <b>18 ± 2</b>     | <b>-0.03 ± 0.04</b>            |
| <b>NaA527C PLS<br/>+MgATP<br/>+GSSG</b> | 23.88                                                         | 19.64             | 31.19            | 30.18             | 26.25            | 37.11             | 0.1618                         |
|                                         | 24.36                                                         | 26.97             | 32.05            | 31.50             | 33.88            | 35.79             | 0.1473                         |
|                                         | 19.28                                                         | 26.69             | 33.64            | 31.78             | 29.64            | 35.41             | 0.1669                         |
| <b>Average</b>                          | <b>23 ± 3</b>                                                 | <b>24 ± 4</b>     | <b>32 ± 1</b>    | <b>31.2 ± 0.9</b> | <b>30 ± 4</b>    | <b>36.1 ± 0.9</b> | <b>0.16 ± 0.01</b>             |
| <b>NaS526C PLS<br/>+MgATP<br/>+GSSG</b> | 22.86                                                         | 42.06             | 53.21            | 66.26             | 77.55            | 79.59             | 0.7679                         |
|                                         | 21.26                                                         | 41.68             | 59.75            | 61.69             | 84.84            | 92.92             | 0.9328                         |
|                                         | 22.58                                                         | 37.91             | 61.09            | 64.64             | 82.63            | 103.12            | 1.029                          |
| <b>Average</b>                          | <b>22.2 ± 0.9</b>                                             | <b>41 ± 2</b>     | <b>58 ± 4</b>    | <b>64 ± 2</b>     | <b>82 ± 4</b>    | <b>92 ± 12</b>    | <b>0.9 ± 0.1</b>               |
| <b>NaT525C PLS<br/>+MgATP<br/>+GSSG</b> | 23.32                                                         | 25.75             | 15.61            | 49.92             | 58.39            | 63.36             | 0.6332                         |
|                                         | 20.60                                                         | 26.69             | 40.53            | 51.72             | 52.88            | 37.39             | 0.3309                         |
|                                         | 21.82                                                         | 25.94             | 39.12            | 42.16             | 59.62            | 57.18             | 0.535                          |
| <b>Average</b>                          | <b>22 ± 1</b>                                                 | <b>26.1 ± 0.5</b> | <b>32 ± 14</b>   | <b>48 ± 5</b>     | <b>57 ± 4</b>    | <b>53 ± 14</b>    | <b>0.5 ± 0.2</b>               |
| <b>NaE523Q PLS<br/>+MgATP<br/>+GSSG</b> | 21.82                                                         | 26.31             | 30.16            | 31.69             | 32.19            | 32.12             | 0.1345                         |
|                                         | 16.01                                                         | 24.62             | 30.91            | 8.99              | 35.00            | 33.71             | 0.1862                         |
|                                         | 17.88                                                         | 21.80             | 23.30            | 32.07             | 35.00            | 34.47             | 0.2501                         |
| <b>Average</b>                          | <b>19 ± 3</b>                                                 | <b>24 ± 2</b>     | <b>28 ± 4</b>    | <b>24 ± 13</b>    | <b>34 ± 2</b>    | <b>33 ± 1</b>     | <b>0.19 ± 0.06</b>             |

**Table S4. Data collection and refinement statistics of NaA527C.**

|                                | <b>NaA527C native</b>                     | <b>NaA527C SeMet</b>                     |
|--------------------------------|-------------------------------------------|------------------------------------------|
| Beamline                       | SSRL 12-2                                 | SSRL 12-2                                |
| Wavelength (Å)                 | 0.97946                                   | 0.97949                                  |
| Resolution range (Å)           | 39.37 - 3.70 (3.832 - 3.70)               | 39.72 - 4.50 (4.66 - 4.50)               |
| Space group                    | P 1                                       | P 1                                      |
| Unit cell (Å, °)               | 129.18 133.61 134.26 110.619 98.282 101.2 | 129.19 133.14 134.27 109.61 98.51 101.67 |
| Total reflections              | 603652 (61595)                            | 972530 (99987)                           |
| Unique reflections             | 84628 (7646)                              | 47277 (4667)                             |
| Multiplicity                   | 7.1 (7.3)                                 | 20.6 (21.4)                              |
| Completeness (%)               | 97.55 (89.28)                             | 99.3 (99.3)                              |
| Mean I/sigma(I)                | 7.31 (0.74)                               | 8.1 (1.4)                                |
| Wilson B-factor                | 141.79                                    | 163.64                                   |
| R-merge                        | 0.167 (3.050)                             | 0.291 (3.241)                            |
| R-meas                         | 0.180 (3.283)                             | 0.298 (3.320)                            |
| R-pim                          | 0.067 (1.206)                             | 0.066 (0.712)                            |
| CC1/2                          | 0.999 (0.412)                             | 0.998 (0.761)                            |
| CC*                            | 1.000 (0.764)                             |                                          |
| Reflections used in refinement | 83473 (7643)                              |                                          |
| Reflections used for R-free    | 4185 (346)                                |                                          |
| R-work                         | 0.240 (0.356)                             |                                          |
| R-free                         | 0.288 (0.400)                             |                                          |
| CC(work)                       | 0.787 (0.709)                             |                                          |
| CC(free)                       | 0.841 (0.703)                             |                                          |
| Number of non-hydrogen atoms   | 36839                                     |                                          |
| macromolecules                 | 36615                                     |                                          |
| ligands                        | 224                                       |                                          |
| Protein residues               | 4722                                      |                                          |
| RMS (bonds) (Å)                | 0.004                                     |                                          |
| RMS (angles) (°)               | 0.95                                      |                                          |
| Ramachandran favored (%)       | 97.95                                     |                                          |
| Ramachandran allowed (%)       | 1.96                                      |                                          |
| Ramachandran outliers (%)      | 0.09                                      |                                          |
| Rotamer outliers (%)           | 0.40                                      |                                          |
| Clashscore                     | 6.13                                      |                                          |
| Average B-factor               | 178.14                                    |                                          |
| macromolecules                 | 178.04                                    |                                          |
| ligands                        | 194.08                                    |                                          |

\*\*Statistics for the highest-resolution shell are shown in parentheses.

**Table S5. Data collection and refinement statistics of NaS526C.**

| <b>NaS526C SeMet</b>           |                             |
|--------------------------------|-----------------------------|
| Beamline                       | SSRL 12-2                   |
| Wavelength (Å)                 | 0.97938                     |
| Resolution range (Å)           | 39.71 - 3.40 (3.522 - 3.40) |
| Space group                    | P 21 21 21                  |
| Unit cell (Å, °)               | 95.5 134.58 190.12 90 90 90 |
| Total reflections              | 916579 (84633)              |
| Unique reflections             | 34343 (3016)                |
| Multiplicity                   | 26.7 (25.1)                 |
| Completeness (%)               | 98.64 (89.27)               |
| Mean I/sigma(I)                | 17.26 (1.19)                |
| Wilson B-factor                | 138.15                      |
| R-merge                        | 0.148 (3.919)               |
| R-meas                         | 0.151 (4.000)               |
| R-pim                          | 0.029 (0.792)               |
| CC1/2                          | 1.000 (0.588)               |
| CC*                            | 1.000 (0.861)               |
| Reflections used in refinement | 33962 (3012)                |
| Reflections used for R-free    | 1696 (153)                  |
| R-work                         | 0.192 (0.295)               |
| R-free                         | 0.234 (0.377)               |
| CC(work)                       | 0.727 (0.820)               |
| CC(free)                       | 0.865 (0.750)               |
| Number of non-hydrogen atoms   | 8921                        |
| macromolecules                 | 8859                        |
| ligands                        | 62                          |
| Protein residues               | 1147                        |
| RMS (bonds) (Å)                | 0.002                       |
| RMS (angles) (°)               | 0.57                        |
| Ramachandran favored (%)       | 98.77                       |
| Ramachandran allowed (%)       | 1.23                        |
| Ramachandran outliers (%)      | 0.00                        |
| Rotamer outliers (%)           | 0.88                        |
| Clashscore                     | 7.07                        |
| Average B-factor               | 196.93                      |
| macromolecules                 | 196.93                      |
| ligands                        | 197.86                      |

\*\*Statistics for the highest-resolution shell are shown in parentheses.

**Table S6. Data collection and refinement statistics of NaT525C.**

|                                | <b>NaT525C native</b>           | <b>NaT525C SeMet</b>         |
|--------------------------------|---------------------------------|------------------------------|
| Beamline                       | APS GM/CA 23-IDB                | APS GM/CA 23-IDB             |
| Wavelength (Å)                 | 1.033202                        | 0.979338                     |
| Resolution range (Å)           | 39.1 - 3.65 (3.78 - 3.65)       | 39.31 - 3.90 (4.21 - 3.90)   |
| Space group                    | P 21 21 21                      | P 21 21 21                   |
| Unit cell (Å, °)               | 94.164 135.415 191.592 90 90 90 | 93.78 136.37 192.48 90 90 90 |
| Total reflections              | 246061 (22321)                  | 237126 (49769)               |
| Unique reflections             | 27912 (2712)                    | 23170 (4675)                 |
| Multiplicity                   | 8.8 (8.1)                       | 10.2 (10.6)                  |
| Completeness (%)               | 97.77 (97.54)                   | 99.9 (99.9)                  |
| Mean I/sigma(I)                | 14.33 (1.11)                    | 12.1 (1.6)                   |
| Wilson B-factor                | 172.32                          | 180.32                       |
| R-merge                        | 0.076 (2.002)                   | 0.100 (1.852)                |
| R-meas                         | 0.080 (2.146)                   | 0.106 (1.945)                |
| R-pim                          | 0.027 (0.758)                   | 0.033 (0.590)                |
| CC1/2                          | 0.999 (0.634)                   | 1.000 (0.586)                |
| CC*                            | 1.000 (0.881)                   |                              |
| Reflections used in refinement | 27348 (2699)                    |                              |
| Reflections used for R-free    | 1356 (126)                      |                              |
| R-work                         | 0.251 (0.430)                   |                              |
| R-free                         | 0.285 (0.475)                   |                              |
| CC(work)                       | 0.713 (0.364)                   |                              |
| CC(free)                       | 0.877 (0.304)                   |                              |
| Number of non-hydrogen atoms   | 8835                            |                              |
| macromolecules                 | 8773                            |                              |
| ligands                        | 62                              |                              |
| Protein residues               | 1135                            |                              |
| RMS (bonds) (Å)                | 0.003                           |                              |
| RMS (angles) (°)               | 0.63                            |                              |
| Ramachandran favored (%)       | 97.70                           |                              |
| Ramachandran allowed (%)       | 2.30                            |                              |
| Ramachandran outliers (%)      | 0.00                            |                              |
| Rotamer outliers (%)           | 0.22                            |                              |
| Clashscore                     | 7.07                            |                              |
| Average B-factor               | 214.38                          |                              |
| macromolecules                 | 214.56                          |                              |
| ligands                        | 189.06                          |                              |

\*\*Statistics for the highest-resolution shell are shown in parentheses.

**Table S7. Data collection and refinement statistics of NaE523Q.**

| <b>NaE523Q SeMet</b>           |                                 |
|--------------------------------|---------------------------------|
| Beamline                       | SSRL 12-2                       |
| Wavelength (Å)                 | 0.97946                         |
| Resolution range (Å)           | 38.63 - 3.30 (3.419 - 3.30)     |
| Space group                    | P 21 21 21                      |
| Unit cell (Å, °)               | 89.346 115.354 184.536 90 90 90 |
| Total reflections              | 387847 (39220)                  |
| Unique reflections             | 29277 (2861)                    |
| Multiplicity                   | 13.2 (13.6)                     |
| Completeness (%)               | 99.32 (98.72)                   |
| Mean I/sigma(I)                | 11.11 (1.01)                    |
| Wilson B-factor                | 103.58                          |
| R-merge                        | 0.190 (2.680)                   |
| R-meas                         | 0.200 (2.784)                   |
| R-pim                          | 0.054 (0.748)                   |
| CC1/2                          | 1.000 (0.700)                   |
| CC*                            | 1.000 (0.908)                   |
| Reflections used in refinement | 29179 (2845)                    |
| Reflections used for R-free    | 1434 (127)                      |
| R-work                         | 0.234 (0.330)                   |
| R-free                         | 0.300 (0.439)                   |
| CC(work)                       | 0.684 (0.848)                   |
| CC(free)                       | 0.827 (0.615)                   |
| Number of non-hydrogen atoms   | 8842                            |
| macromolecules                 | 8780                            |
| ligands                        | 62                              |
| Protein residues               | 1136                            |
| RMS (bonds) (Å)                | 0.002                           |
| RMS (angles) (°)               | 0.63                            |
| Ramachandran favored (%)       | 97.52                           |
| Ramachandran allowed (%)       | 2.48                            |
| Ramachandran outliers (%)      | 0.00                            |
| Rotamer outliers (%)           | 1.77                            |
| Clashscore                     | 8.24                            |
| Average B-factor               | 134.03                          |
| macromolecules                 | 133.82                          |
| ligands                        | 163.57                          |

\*\*Statistics for the highest-resolution shell are shown in parentheses.

**Table S8. Data collection and refinement statistics of NaAtm1.**

|                                | <i>NaAtm1 native</i>                | <i>NaAtm1 SeMet</i>              |
|--------------------------------|-------------------------------------|----------------------------------|
| Beamline                       | SSRL 12-2                           | SSRL 12-2                        |
| Wavelength (Å)                 | 0.97946                             | 0.9793                           |
| Resolution range (Å)           | 39.33 - 3.35 (3.47 - 3.35)          | 39.85 - 3.60 (3.67 - 3.60)       |
| Space group                    | P 21                                | P 21                             |
| Unit cell (Å, °)               | 169.648 92.498 237.691 90 110.34 90 | 170.10 92.21 237.47 90 110.58 90 |
| Total reflections              | 686114 (60885)                      | 559063 (30390)                   |
| Unique reflections             | 98507 (9041)                        | 79094 (4376)                     |
| Multiplicity                   | 7.0 (6.4)                           | 7.1 (6.9)                        |
| Completeness (%)               | 97.85 (91.11)                       | 98.1 (95.8)                      |
| Mean I/sigma(I)                | 9.43 (0.97)                         | 7.5 (1.1)                        |
| Wilson B-factor                | 91.20                               | 94.99                            |
| R-merge                        | 0.174 (1.768)                       | 0.211 (1.942)                    |
| R-meas                         | 0.189 (1.927)                       | 0.228 (2.100)                    |
| R-pim                          | 0.071 (0.754)                       | 0.086 (0.787)                    |
| CC1/2                          | 0.999 (0.530)                       | 0.994 (0.466)                    |
| CC*                            | 1.000 (0.832)                       |                                  |
| Reflections used in refinement | 97914 (9035)                        |                                  |
| Reflections used for R-free    | 4897 (425)                          |                                  |
| R-work                         | 0.254 (0.353)                       |                                  |
| R-free                         | 0.282 (0.365)                       |                                  |
| CC(work)                       | 0.740 (0.685)                       |                                  |
| CC(free)                       | 0.529 (0.606)                       |                                  |
| Number of non-hydrogen atoms   | 26975                               |                                  |
| macromolecules                 | 26783                               |                                  |
| ligands                        | 192                                 |                                  |
| Protein residues               | 3464                                |                                  |
| RMS (bonds) (Å)                | 0.003                               |                                  |
| RMS (angles) (°)               | 0.60                                |                                  |
| Ramachandran favored (%)       | 97.35                               |                                  |
| Ramachandran allowed (%)       | 2.59                                |                                  |
| Ramachandran outliers (%)      | 0.06                                |                                  |
| Rotamer outliers (%)           | 0.58                                |                                  |
| Clashscore                     | 8.33                                |                                  |
| Average B-factor               | 120.02                              |                                  |
| macromolecules                 | 120.15                              |                                  |
| ligands                        | 101.67                              |                                  |

\*\*Statistics for the highest-resolution shell are shown in parentheses.



**Table S9. Cryo-EM data collection, refinement and validation statistics**

|                                           | Closed               | Inward-facing                           |
|-------------------------------------------|----------------------|-----------------------------------------|
| <b>Data Collection and processing</b>     |                      |                                         |
| Microscope                                | Titan Krios at S2C2  | Titan Krios at Caltech Cryo-EM facility |
| Camera                                    | Gatan K3             | Gatan K2 Summit                         |
| Magnification                             | x29,000              | x165,000                                |
| Voltage (keV)                             | 300                  | 300                                     |
| Exposure (e/Å <sup>2</sup> )              | 48.6                 | 36                                      |
| Pixel size (Å)                            | 0.852                | 0.834                                   |
| Defocus Range (µm)                        | - 1.7 to -2.4        | - 1.0 to -3.5                           |
| Initial Particle Image (no.)              | 3,978,816            | 1,145,444                               |
| Final Particle Image (no.)                | 169,278              | 102,076                                 |
| Symmetry Imposed                          | C2                   | C2                                      |
| Map Resolution (Å)                        | 3.03                 | 3.88                                    |
| FSC Threshold                             | 0.143                | 0.143                                   |
| Map Resolution Range (Å)                  | 2.8-3.8              | 3.8 - 4.5                               |
| <b>Refinement</b>                         |                      |                                         |
| Initial Model Used                        | PDB ID: 6PAR         | PDB ID: 4MRN                            |
| Model Resolution (Å)                      | 3.0                  | 3.9                                     |
| FSC Threshold                             | 0.143                | 0.143                                   |
| Map Sharpening B-factor (Å <sup>2</sup> ) | -86                  | -121                                    |
| <b>Model composition</b>                  |                      |                                         |
| non-hydrogen atoms                        | 9144                 | 9156                                    |
| protein residues                          | 1168                 | 1178                                    |
| ligands                                   | ADP: 2; MG: 2; VO4:2 | -                                       |
| <b>Average B-factors (Å<sup>2</sup>)</b>  |                      |                                         |
| protein                                   | 94.1                 | 22.5                                    |
| ligands                                   | 86.7                 | -                                       |
| <b>R.m.s. deviations</b>                  |                      |                                         |
| Bond length (Å)                           | 0.005                | 0.007                                   |
| Bond angles (°)                           | 0.967                | 0.929                                   |
| <b>Validation</b>                         |                      |                                         |
| MolProbity score                          | 2.2                  | 1.67                                    |
| Clashscore                                | 10.2                 | 5.1                                     |
| Rotamer outliers                          | 4.9                  | 1.7                                     |
| <b>Ramachandran plot</b>                  |                      |                                         |
| Ramachandran favored (%)                  | 97.3                 | 96.6                                    |
| Ramachandran allowed (%)                  | 2.7                  | 3.4                                     |
| Ramachandran outliers (%)                 | 0                    | 0                                       |

## SI References

1. P. D. Adams *et al.*, PHENIX: a comprehensive Python-based system for macromolecular structure solution. *Acta Crystallogr. D Biol. Crystallogr.* **66**, 213-221 (2010).
2. A. Punjani, J. L. Rubinstein, D. J. Fleet, M. A. Brubaker, cryoSPARC: algorithms for rapid unsupervised cryo-EM structure determination. *Nature methods* **14**, 290-296 (2017).
3. B. Zehnpfennig, I. L. Urbatsch, H. J. Galla, Functional reconstitution of human ABCC3 into proteoliposomes reveals a transport mechanism with positive cooperativity. *Biochemistry* **48**, 4423-4430 (2009).
4. A. L. Davidson, H. Nikaido, Overproduction, solubilization, and reconstitution of the maltose transport system from *Escherichia coli*. *Journal of Biological Chemistry* **265**, 4254-4260 (1990).
5. J. S. Patzlaff, T. van der Heide, B. Poolman, The ATP/substrate stoichiometry of the ATP-binding cassette (ABC) transporter OpuA. *Journal of Biological Chemistry* **278**, 29546-29551 (2003).
6. A. N. J. A. Lycklama, R. Vietrov, G. K. Schuurman-Wolters, B. Poolman, Energy Coupling Efficiency in the Type I ABC Transporter GlnPQ. *Journal of Molecular Biology* **430**, 853-866 (2018).
7. G. D. Eytan, R. Regev, Y. G. Assaraf, Functional reconstitution of P-glycoprotein reveals an apparent near stoichiometric drug transport to ATP hydrolysis. *Journal of Biological Chemistry* **271**, 3172-3178 (1996).
8. J. Wang *et al.*, Sterol transfer by ABCG5 and ABCG8: in vitro assay and reconstitution. *Journal of Biological Chemistry* **281**, 27894-27904 (2006).
9. D. A. Dean, A. L. Davidson, H. Nikaido, Maltose transport in membrane vesicles of *Escherichia coli* is linked to ATP hydrolysis. *Proc. Natl. Acad. Sci. U. S. A.* **86**, 9134-9138 (1989).
10. M. Dong, F. Penin, L. G. Baggetto, Efficient purification and reconstitution of P-glycoprotein for functional and structural studies. *Journal of Biological Chemistry* **271**, 28875-28883 (1996).
11. K. Nikaido, G. F. Ames, One intact ATP-binding subunit is sufficient to support ATP hydrolysis and translocation in an ABC transporter, the histidine permease. *Journal of Biological Chemistry* **274**, 26727-26735 (1999).
12. I. Manolaridis *et al.*, Cryo-EM structures of a human ABCG2 mutant trapped in ATP-bound and substrate-bound states. *Nature* **563**, 426-430 (2018).
13. S. Hofmann *et al.*, Conformation space of a heterodimeric ABC exporter under turnover conditions. *Nature* **571**, 580-583 (2019).
14. E. L. Borths, B. Poolman, R. N. Hvorup, K. P. Locher, D. C. Rees, In vitro functional characterization of BtuCD-F, the *Escherichia coli* ABC transporter for vitamin B12 uptake. *Biochemistry* **44**, 16301-16309 (2005).
15. J. S. Woo, A. Zeltina, B. A. Goetz, K. P. Locher, X-ray structure of the *Yersinia pestis* heme transporter HmuUV. *Nature structural & molecular biology* **19**, 1310-1315 (2012).
16. J. Chen, S. Sharma, F. A. Quioco, A. L. Davidson, Trapping the transition state of an ATP-binding cassette transporter: evidence for a concerted mechanism of maltose transport. *Proc. Natl. Acad. Sci. U. S. A.* **98**, 1525-1530 (2001).
17. H. Chavan, M. M. Khan, G. Tegos, P. Krishnamurthy, Efficient purification and reconstitution of ATP binding cassette transporter B6 (ABCB6) for functional and structural studies. *Journal of Biological Chemistry* **288**, 22658-22669 (2013).
